# Supplementary material for: An interbacterial DNA deaminase toxin directly mutagenizes surviving target populations
Source: eLife. 2021 Jan 15;10:e62967. doi: 10.7554/eLife.62967 (PMC7901873; doi:10.7554/eLife.62967)
Supplement: Supplementary file 1. [file elife-62967-supp1.xlsx]

## Sheet: Sheet1
E. coli AB1157 NC_000913.3 WGS
Isolate	Position	Context	DddA signature (Yes/No)
AB1157-A2	2573448	GGA	Y
AB1157-A6	636682	AGA	Y
AB1157-A7	561441	GGA	Y
AB1157-A7	2380964	TCC	Y
AB1157-A7	4546218	TCG	Y
AB1157-A8	700660	CGA	Y
AB1157-A8	903356	TCC	Y
AB1157-A8	1019069	CGA	Y
AB1157-A8	2180410	TCC	Y
AB1157-A8	4023769	CGA	Y
AB1157-B3	457974	TCC	Y
AB1157-B4	682518	TGA	Y
E. coli AB1157 NC_000913.3 rpoB
Isolate	Position	Context	DddA signature (Yes/No)
AB1157-A2	4182779	TCT	Y
AB1157-A4	4182790	GGA	Y
AB1157-A6	4182779	TCT	Y
AB1157-A7	4182779	TCT	Y
AB1157-A8	4182779	TCT	Y
AB1157-B3	4182779	TCT	Y
AB1157-B4	4182779	TCT	Y
AB1157-C1	4182779	TCT	Y
AB1157-C10	4182779	TCT	Y
AB1157-C11	4182779	TCT	Y
AB1157-C12	4182790	GGA	Y
AB1157-C2	4182779	TCT	Y
AB1157-C3	4182779	TCT	Y
AB1157-C4	4182779	TCT	Y
AB1157-C5	4182779	TCT	Y
AB1157-C6	4182836	TCC	Y
AB1157-C7	4182779	TCT	Y
AB1157-C8	4182779	TCT	Y
AB1157-C9	4182779	TCT	Y
AB1157-D1	4182779	TCT	Y
AB1157-D2	4182779	TCT	Y
AB1157-D3	4182779	TCT	Y
AB1157-D4	4182779	TCT	Y
AB1157-D5	4182779	TCT	Y
E. coli EHEC NZ_CP008957.1 WGS
Isolate	Position	Context	DddA signature (Yes/No)
EHEC-A2	745731	TCG	Y
EHEC-A2	839041	CGA	Y
EHEC-A2	2166407	CGA	Y
EHEC-A2	4797858	TCG	Y
EHEC-A2	5079358	TCC	Y
EHEC-A2	5276086	CGA	Y
EHEC-A3	1614650	TCG	Y
EHEC-A3	2231975	TCG	Y
EHEC-A3	2523951	CGA	Y
EHEC-A3	3267194	CGA	Y
EHEC-A3	3370445	TCG	Y
EHEC-A3	3444101	TCG	Y
EHEC-A3	3928392	TCG	Y
EHEC-A3	5079358	TCC	Y
EHEC-A4	1330651	GGA	Y
EHEC-A4	2175988	CGA	Y
EHEC-A4	4851817	TCG	Y
EHEC-A4	5079358	TCC	Y
EHEC-A4	5466257	TCG	Y
EHEC-B1	1242341	TCG	Y
EHEC-B1	3849029	TCG	Y
EHEC-B1	5079358	TCC	Y
EHEC-B1	5428118	CGA	Y
EHEC-B2	3706386	CGA	Y
EHEC-B2	4623007	CGA	Y
EHEC-B2	5079358	TCC	Y
EHEC-B3	784298	TCC	Y
EHEC-B3	920896	TCG	Y
EHEC-B3	2142210	CGA	Y
EHEC-B3	3144163	TCG	Y
EHEC-B3	3190034	TCG	Y
EHEC-B3	3874627	CGA	Y
EHEC-B3	5079358	TCC	Y
EHEC-B3	5280427	AGA	Y
EHEC-B4	10950	TCG	Y
EHEC-B4	195295	TCG	Y
EHEC-B4	817797	TCG	Y
EHEC-B4	1009128	TCC	Y
EHEC-B4	1199226	TCG	Y
EHEC-B4	2381467	CGA	Y
EHEC-B4	3121763	TCG	Y
EHEC-B4	3288109	TCC	Y
EHEC-B4	3313845	TCG	Y
EHEC-B4	3443031	TCC	Y
EHEC-B4	3603862	TCC	Y
EHEC-B4	3613539	CGA	Y
EHEC-B4	3855072	GGA	Y
EHEC-B4	4573974	CGA	Y
EHEC-B4	4948346	TCC	Y
EHEC-B4	5104176	GGA	Y
EHEC-B4	5525915	CGA	Y
EHEC-B4	13936	GCG	N
E. coli EHEC NZ_CP008957.1 rpoB
Isolate	Position	Context	DddA signature (Yes/No)
EHEC-A2	4771622	GGA	Y
EHEC-A3	4771622	GGA	Y
EHEC-A4	4771622	GGA	Y
EHEC-B1	4771622	GGA	Y
EHEC-B2	4771622	GGA	Y
EHEC-B3	4771622	GGA	Y
EHEC-B4	4771622	GGA	Y
EHEC-C1	4771622	GGA	Y
EHEC-C2	4771622	GGA	N
EHEC-C3	4771622	GGA	N
EHEC-C4	4771622	GGA	Y
EHEC-C5	4771622	GGA	Y
EHEC-C6	4771622	GGA	N
EHEC-C7	4771668	TCC	Y
K. pneumoniae CP000647.1 WGS
Isolate	Position	Context	DddA signature (Yes/No)
KP-A1	268966	TCG	Y
KP-A1	630584	CGA	Y
KP-A1	972660	TCA	Y
KP-A1	1056047	TCG	Y
KP-A1	1111902	CGA	Y
KP-A1	1188364	TCG	Y
KP-A1	1933442	TCG	Y
KP-A1	2664710	CGA	Y
KP-A1	3098987	TCG	Y
KP-A1	3815785	TCG	Y
KP-A1	4237588	TCG	Y
KP-A1	4343291	CGA	Y
KP-A1	4416303	CGA	Y
KP-A2	400833	TCG	Y
KP-A2	441001	CGA	Y
KP-A2	443547	TCG	Y
KP-A2	596586	TCG	Y
KP-A2	699516	TCG	Y
KP-A2	1144391	TCG	Y
KP-A2	1374149	TCG	Y
KP-A2	1646149	CGA	Y
KP-A2	1765683	TCG	Y
KP-A2	1875143	CGA	Y
KP-A2	1953329	CGA	Y
KP-A2	2626210	CGA	Y
KP-A2	2695891	CGA	Y
KP-A2	3304887	TCG	Y
KP-A2	3718513	TCG	Y
KP-A2	3816428	TCG	Y
KP-A2	4267282	TCG	Y
KP-A2	4333019	CGA	Y
KP-A2	4649355	TCG	Y
KP-A2	4674778	CGA	Y
KP-A2	4857315	CGA	Y
KP-A2	5305473	TCG	Y
KP-A3	132760	TCG	Y
KP-A3	782378	TCG	Y
KP-A3	1048665	TCG	Y
KP-A3	1406220	TCG	Y
KP-A3	1406242	CGA	Y
KP-A3	1542047	CGA	Y
KP-A3	1930481	GCC	Y
KP-A3	2121913	TCG	Y
KP-A3	2211040	CGA	Y
KP-A3	2228986	TCG	Y
KP-A3	2620049	TCG	Y
KP-A3	2862127	TCG	Y
KP-A3	3239414	CGA	Y
KP-A3	3722729	TCG	Y
KP-A3	5070069	CGA	Y
KP-A3	5089002	GGA	Y
KP-A3	5172472	TCG	Y
KP-A3	5245737	TCG	Y
KP-B1	453408	CGA	Y
KP-B1	766528	CGA	Y
KP-B1	949753	CGG	N
KP-B1	2254942	TCG	Y
KP-B1	2318894	TCG	Y
KP-B1	2637023	CGA	Y
KP-B1	3063632	CGA	Y
KP-B1	3133040	TCC	Y
KP-B1	3345186	TCG	Y
KP-B1	3519995	TCG	Y
KP-B1	4046644	TCG	Y
KP-B1	4600477	TCG	Y
KP-B1	4651523	GCG	N
KP-B1	5313678	TCG	N
KP-B2	327129	TCG	Y
KP-B2	1400074	CCG	N
KP-B2	2254942	TCG	Y
KP-B2	2318894	TCG	Y
KP-B2	3049130	TCG	Y
KP-B2	3063632	CGA	Y
KP-B2	3133040	TCC	Y
KP-B2	3519995	TCG	Y
KP-B2	4046644	TCG	Y
KP-B2	5313678	TCG	N
KP-B3	923447	TCG	Y
KP-B3	1400074	CCG	N
KP-B3	1725719	TCC	N
KP-B3	2354429	CGA	Y
KP-B3	2664710	CGA	Y
KP-B3	3014427	CGA	Y
KP-B3	3345186	TCG	Y
KP-B3	3851167	TCG	Y
KP-B4	327129	TCG	Y
KP-B4	1400074	CCG	N
KP-B4	2254942	TCG	Y
KP-B4	2318894	TCG	Y
KP-B4	2926868	GGA	Y
KP-B4	2956330	CGA	Y
KP-B4	3345186	TCG	Y
KP-B4	3786107	TCG	Y
KP-B4	4055568	TCG	Y
KP-B4	5313678	TCG	N
KP-B5	1386432	CGA	Y
KP-B5	1400074	CCG	N
KP-B5	3347985	TCG	Y
KP-B6	327129	TCG	Y
KP-B6	1400074	CCG	N
KP-B6	2254942	TCG	Y
KP-B6	2318894	TCG	Y
KP-B6	3049130	TCG	Y
KP-B6	3063632	CGA	Y
KP-B6	3133040	TCC	Y
KP-B6	3519995	TCG	Y
KP-B6	4046644	TCG	Y
KP-B6	5313678	TCG	N
KP-B7	1386432	CGA	Y
KP-B7	1400074	CCG	N
KP-B7	3347985	TCG	Y
KP-B8	1386432	CGA	Y
KP-B8	1400074	CCG	N
KP-B8	3347985	TCG	Y
K. pneumoniae CP000647.1 rpoB
Isolate	Position	Context	DddA signature (Yes/No)
KP-A1	4771622	GGA	Y
KP-A2	4771622	GGA	Y
KP-A3	4771622	GGA	Y
KP-B1	4771622	GGA	Y
KP-B2	4771622	GGA	Y
KP-B3	4771622	GGA	Y
KP-B4	4771622	GGA	Y
KP-B5	4771622	GGA	Y
KP-B6	4771622	GGA	Y
KP-B7	4771622	GGA	Y
KP-B8	4771622	GGA	Y
KP-C1	4771622	GGA	Y
KP-C2	4771622	GGA	Y
KP-C3	4771622	GGA	Y
KP-C4	4771622	GGA	Y
KP-C5	4771622	GGA	Y
KP-C6	4771622	GGA	Y
KP-C7	4771622	GGA	Y
KP-C8	4771622	GGA	Y
KP-C9	4771622	GGA	Y
P. aeruginosa PAO1 NC_002516.2
Isolate	Position	Context	DddA signature (Yes/No)
PAO1-1	4779056	GAC	N
PAO1-3	4779056	GAC	N
PAO1-5	4779057	GGA	Y
PAO1-6	4779056	GAC	N
PAO1-7	4779056	GAC	N
PAO1-8	4779056	GAC	N
PAO1-13	4778882	TCC	Y
PAO1-14	4778882	TCC	Y
PAO1-14	4779056	GAC	N
PAO1-15	4779057	GGA	Y
PAO1-19	4779057	GGA	Y
PAO1-20	4779056	GAC	N
PAO1-21	4779011	TCC	Y
PAO1-27	4779056	GAC	N
PAO1-31	4779056	GAC	N
PAO1-33	4779056	GAC	N
PAO1-35	4780163	CAG	N
PAO1-38	4779057	GGA	Y
PAO1-39	4779056	GAC	N
PAO1-41	4779056	GAC	N
PAO1-43	4780163	CAG	N
PAO1-43	4779056	GAC	N
PAO1-45	4780163	CAG	N
PAO1-48	4779056	GAC	N
PAO1-50	4779056	GAC	N
PAO1-52	4779056	GAC	N
PAO1-54	4779056	GAC	N
PAO1-56	4779056	GAC	N
PAO1-57	4779056	GAC	N
PAO1-60	4779056	GAC	N
PAO1-61	4779056	GAC	N
PAO1-62	4779056	GAC	N
PAO1-66	4779056	GAC	N
PAO1-67	4779056	GAC	N
PAO1-68	4780163	CAG	N
PAO1-69	4779056	GAC	N
PAO1-70	4779056	GAC	N
PAO1-71	4779056	GAC	N
PAO1-72	4779056	GAC	N
PAO1-74	4779056	GAC	N
